# Supplementary material
Source: Springer Nature journal article supplement (https://www.springermedizin.de/resource/supplementary/13032_2009_35_MOESM1_ESM.pdf/9651494)

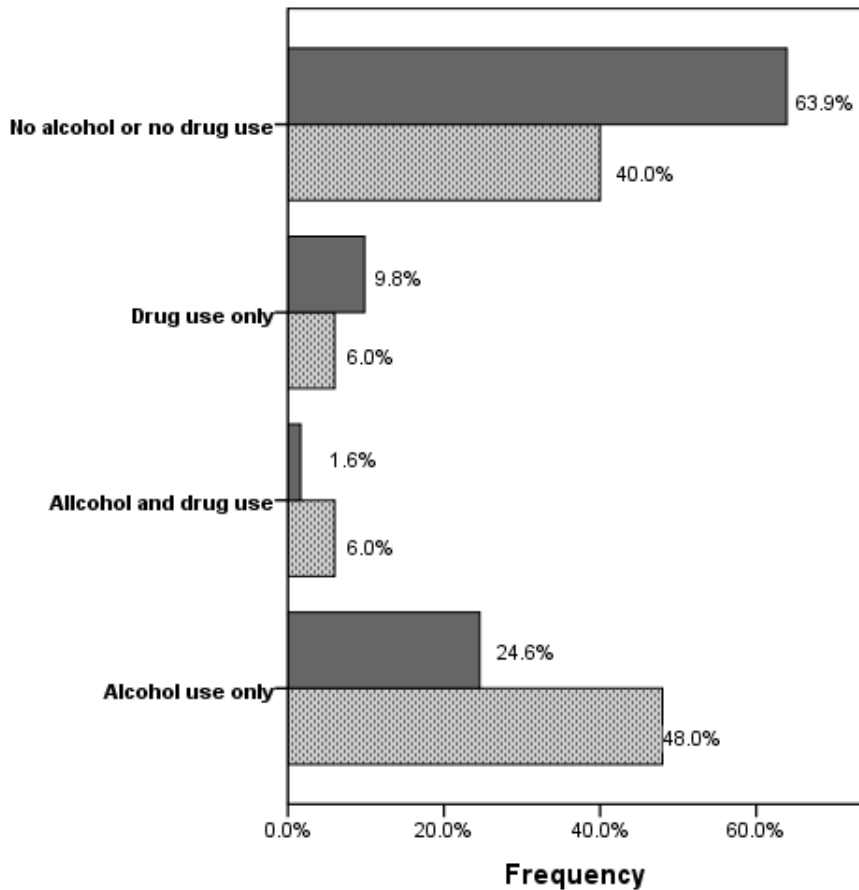

### CT head findings

- Less severe TBI
- More severe TBI

Supplement: MOESM1 [file 9651494]
